# Supplementary material for: Effect of Local Administration of Meglumine Antimoniate and Polyhexamethylene Biguanide Alone or in Combination with a Toll-like Receptor 4 Agonist for the Treatment of Papular Dermatitis due to Leishmania infantum in Dogs
Source: MDPI journal article supplement (doi:10.3390/pathogens12060821), 2023-06-10
Supplement: s1 [file s1]

## INCIDENT SHEET FOR OWNER (treatment application, adverse effects, or others)

Dog ID

|                                                         |  |  |  |  |  |  |  |  |  |  |  |  |
|---------------------------------------------------------|--|--|--|--|--|--|--|--|--|--|--|--|
| Detection date (days after treatment)                   |  |  |  |  |  |  |  |  |  |  |  |  |
| Erythema / crusts (indicate from 0 to 4)                |  |  |  |  |  |  |  |  |  |  |  |  |
| Edema (indicate from 0 to 4)                            |  |  |  |  |  |  |  |  |  |  |  |  |
| Itching (indicate from 0 to 4)                          |  |  |  |  |  |  |  |  |  |  |  |  |
| Pain (indicate 'yes' or 'no')                           |  |  |  |  |  |  |  |  |  |  |  |  |
| Other skin lesions (mark with an X the day of visit)*   |  |  |  |  |  |  |  |  |  |  |  |  |
| Other clinical signs (mark with an X the day of visit)* |  |  |  |  |  |  |  |  |  |  |  |  |
| Treatment application (indicate 'yes' or 'no')**        |  |  |  |  |  |  |  |  |  |  |  |  |

\* Indicate on the incident sheet of the corresponding visit (1, 2, 3, or 4)

\*\* In the case that the treatment could NOT be applied, describe it in this incident sheet.

Day of visit:

The treatment has not been applied for the following reason:

## ADVERSE EFFECTS BY VETERINARIAN

Day of visit ...../...../.....

Dog ID

**ERYTHEMA / CRUSTS**                      **0      1      2      3      4**

**EDEMA**                                      **0      1      2      3      4**

**ITCHING**                                      **NO**                                      **SI**

**PAIN**                                          **NO**                                          **SI**

**OTHER SKIN LESIONS OR OTHER CLINICAL SIGNS (SPECIFY):**

| Erythema and crusts         | Formation of edemas                                                            |   |
|-----------------------------|--------------------------------------------------------------------------------|---|
| Very slight erythema        | very slight edema (barely noticeable)                                          | 1 |
| Well-defined erythema       | slight edema (edges of the area well defined by elevation)                     | 2 |
| Moderate to severe erythema | Moderate edema (elevation of approximately 1 mm)                               | 3 |
| Severe or crusts formation  | Severe edema (elevation of more than 1 mm, extending beyond the exposure site) | 4 |

PHOTO FOR ADVERSE EFFECT ASSESSMENT

## WITHDRAWAL FROM THE STUDY AND REASON

Day of visit ...../...../.....

Dog ID

| WITHDRAWAL FROM THE STUDY | YES | NO |
|---------------------------|-----|----|
| REASON                    |     |    |

### VETERINARIAN

Signature: \_\_\_\_\_

Date: \_\_\_\_/\_\_\_\_/\_\_\_\_
